# Supplementary material
Source: Springer Nature journal article supplement (https://www.springermedizin.de/resource/supplementary/12887_2011_698_MOESM1_ESM.pdf/9475840)

**a**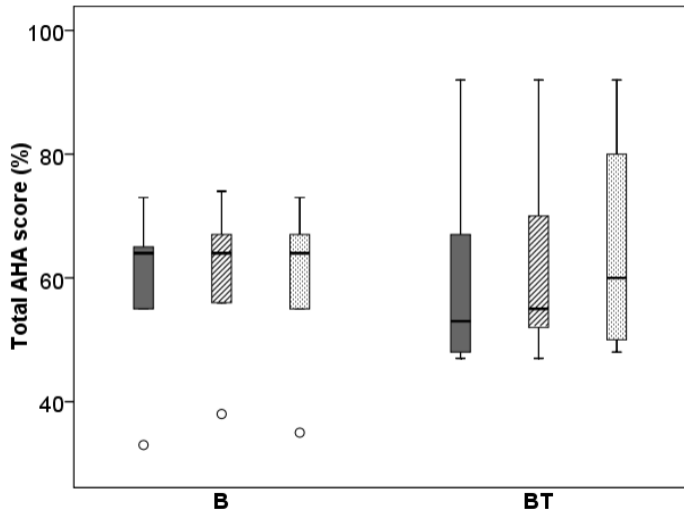**b**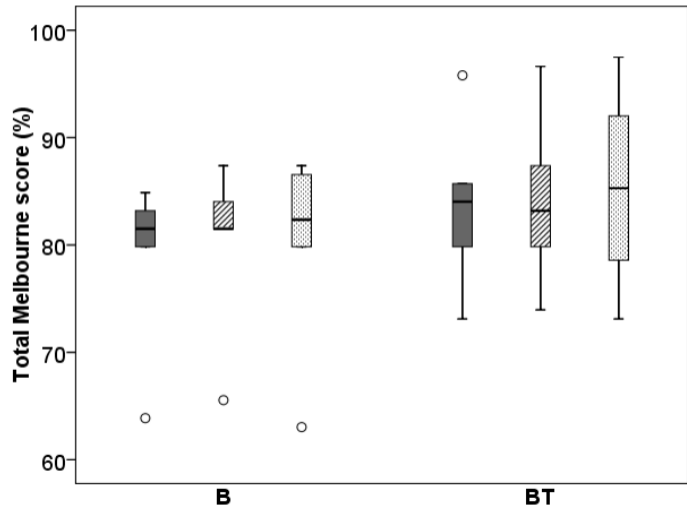

Supplement: MOESM1 [file 9475840]
